# Supplementary material
Source: PubMed Central journal article supplement (PMC6757238)
Supplement: Supp_Table1.pdf [file Supp_Table1.pdf]

## Supplementary Data

**Supplementary Table S1. Cannabis for Medical Reasons and Effect of Legalization**

| Question                                                                                                      | <i>n</i> = 104          |
|---------------------------------------------------------------------------------------------------------------|-------------------------|
|                                                                                                               | <i>n</i> (%)            |
| If you were to be prescribed cannabis for medicinal purposes, method of administration-preferred <sup>a</sup> |                         |
| Joint                                                                                                         | 84 (81)                 |
| Pipe                                                                                                          | 15 (14)                 |
| Bong                                                                                                          | 8 (8)                   |
| Sublingual spray                                                                                              | 8 (8)                   |
| Vaporizer                                                                                                     | 12 (12)                 |
| Inhaler                                                                                                       | 7 (7)                   |
| Rectal suppository                                                                                            | 2 (2)                   |
| Patch on the skin                                                                                             | 5 (5)                   |
| Do you anticipate you will continue to use cannabis in the future                                             |                         |
| Yes                                                                                                           | 46 (44)                 |
| No                                                                                                            | 3 (3)                   |
| Maybe                                                                                                         | 7 (7)                   |
| Probably                                                                                                      | 11 (11)                 |
| Definitely                                                                                                    | 37 (36)                 |
| Scenarios that would make you more likely to continue using cannabis (yes/no/maybe)                           |                         |
| Legalized for recreational use in Canada                                                                      | 51 (49)/47 (45)/6 (6)   |
| Prescribed by a health care practitioner                                                                      | 48 (46)/49 (47)/7 (7)   |
| Confirmed by researchers to be safe                                                                           | 40 (39)/51 (49)/13 (13) |
| Confirmed by researchers not to be addictive                                                                  | 35 (34)/57 (55)/12 (12) |
| Confirmed by researchers to relieve specific symptoms                                                         | 56 (54)/37 (36)/11 (11) |
| Easy to obtain/more accessible                                                                                | 53 (51)/44 (42)/7 (7)   |
| Side effects were milder/more accessible                                                                      | 37 (36)/55 (53)/12 (12) |
| No high associated with the use of cannabis                                                                   | 16 (15)/79 (76)/9 (9)   |
| Prefer not to answer                                                                                          | 4 (4)/7 (7)/3(3)        |

<sup>a</sup>Patients were allowed to choose more than one option.
